# Supplementary material for: The costs and cost effectiveness of providing first-trimester, medical and surgical safe abortion services in KwaZulu-Natal Province, South Africa
Source: PubMed Central journal article supplement (PMC5378341; doi:10.1371/journal.pone.0174615), 2017-04-03
Supplement: pone.0174615.s001.pdf [file pone.0174615.s001.pdf]

**Client Interview Day One (CD1)**

| Today's Date |   |   |   |   |   |
|--------------|---|---|---|---|---|
| d            | d | m | m | y | r |

| Participant ID |  |  |  |  |
|----------------|--|--|--|--|
|                |  |  |  |  |

**Facility ID**

|  |  |  |
|--|--|--|
|  |  |  |
|--|--|--|

*Instructions: (Study staff) Use this form to interview the woman after she has seen the health care provider and before she leaves the clinic on the same day that she was consented/enrolled into the study. For open responses, write the response in space provided. For Yes/No questions, tick the appropriate box.*

| Question                                                                                                                                                                           | Response                                                                                                                                                                                                                                                                                                                                                                                                                                                                                                                                   |
|------------------------------------------------------------------------------------------------------------------------------------------------------------------------------------|--------------------------------------------------------------------------------------------------------------------------------------------------------------------------------------------------------------------------------------------------------------------------------------------------------------------------------------------------------------------------------------------------------------------------------------------------------------------------------------------------------------------------------------------|
| 1. How old are you?                                                                                                                                                                |                                                                                                                                                                                                                                                                                                                                                                                                                                                                                                                                            |
| 2. a. What is the highest grade in school that you completed?<br><br>b. Are you currently in school?<br><br>c. Do you have a certificate, diploma, or degree beyond matriculation? | a. <input type="checkbox"/> 1 = Grade 5 or less<br><input type="checkbox"/> 2 = Grade 6-8<br><input type="checkbox"/> 3 = Grade 9-10<br><input type="checkbox"/> 4 = Grade 11<br><input type="checkbox"/> 5 = Grade 12 – Matriculated<br><br>b. <input type="checkbox"/> 0 = No<br><input type="checkbox"/> 1 = Yes<br><br>c. <input type="checkbox"/> 0 = No<br><input type="checkbox"/> 1 = Yes, certificate or diploma.<br><i>SPECIFY COURSE:</i><br><hr/> <input type="checkbox"/> 2 = Yes, degree.<br><i>SPECIFY DEGREE:</i><br><hr/> |
| 3. What is your race?                                                                                                                                                              | <input type="checkbox"/> African (1)<br><input type="checkbox"/> White (2)<br><input type="checkbox"/> Coloured (3)<br><input type="checkbox"/> Indian (4)<br><input type="checkbox"/> Other Asian (5)                                                                                                                                                                                                                                                                                                                                     |

**Client Interview Day One (CD1)**

| Today's Date |   |   |   |   |   |
|--------------|---|---|---|---|---|
| d            | d | m | m | y | r |

| Participant ID |  |  |  |  |
|----------------|--|--|--|--|
|                |  |  |  |  |

|                                                                                                                                                                                                         |                                                                                                                                                                                                                                                                                                                                                                                                                                                                                                                                                                       |
|---------------------------------------------------------------------------------------------------------------------------------------------------------------------------------------------------------|-----------------------------------------------------------------------------------------------------------------------------------------------------------------------------------------------------------------------------------------------------------------------------------------------------------------------------------------------------------------------------------------------------------------------------------------------------------------------------------------------------------------------------------------------------------------------|
| <p>4. a. What is your marital status?</p> <p>b. IF MARRIED, what type of marriage is it:</p>                                                                                                            | <p><input type="checkbox"/> Married (1)</p> <p><input type="checkbox"/> Cohabiting (2)</p> <p><input type="checkbox"/> Divorced/separated (3)</p> <p><input type="checkbox"/> Single (4)</p> <p><input type="checkbox"/> Widowed (5)</p> <p><input type="checkbox"/> Legal (1)</p> <p><input type="checkbox"/> Traditional (2)</p>                                                                                                                                                                                                                                    |
| <p>5. How would you describe your employment situation?</p>                                                                                                                                             | <p><input type="checkbox"/> 1= Unemployed looking for work</p> <p><input type="checkbox"/> 2 = Unemployed not looking for work</p> <p><input type="checkbox"/> 3 = Self-employed – working full-time</p> <p><input type="checkbox"/> 4 = Self-employed – working from time to time</p> <p><input type="checkbox"/> 5 = Employed, part-time</p> <p><input type="checkbox"/> 6 = Employed, full-time</p> <p><input type="checkbox"/> 7 = Unable to work</p> <p><input type="checkbox"/> 8 = Retired</p> <p><input type="checkbox"/> 9 = Other <i>SPECIFY</i>: _____</p> |
| <p>6. Do you, or does anyone in your household, currently receive any kind of government grant?</p> <p><i>IF ANY: What kinds of grants do you (or do they) receive? TICK ALL THAT ARE MENTIONED</i></p> | <p><input type="checkbox"/> 0 = No →GO TO Q7</p> <p><input type="checkbox"/> 1 = Yes</p> <p><input type="checkbox"/> 1 = Child grant</p> <p><input type="checkbox"/> 2 = HIV grant</p> <p><input type="checkbox"/> 3 = Pension grant</p> <p><input type="checkbox"/> 4 = Disability grant</p> <p><input type="checkbox"/> 5 = Other <i>SPECIFY</i>: _____</p>                                                                                                                                                                                                         |
| <p>7. What has been your primary source of income (or money) in the last 12 months?</p> <p><i>READ OPTIONS; CHOOSE ONE</i></p>                                                                          | <p><input type="checkbox"/> 0 = None</p> <p><input type="checkbox"/> 1 = Family</p> <p><input type="checkbox"/> 2 = Employment</p> <p><input type="checkbox"/> 3 = Spouse, boyfriend, girlfriend</p> <p><input type="checkbox"/> 4 = Grant (<i>CAN BE OWN GRANT OR CHILD'S GRANT</i>)</p> <p><input type="checkbox"/> 5 = Other <i>SPECIFY</i>: _____</p>                                                                                                                                                                                                             |
| <p>8. Are you currently caring financially for any dependents?</p> <p><i>IF YES: Are your dependents children, adults, or both?</i></p>                                                                 | <p><input type="checkbox"/> 0 = No</p> <p><input type="checkbox"/> 1 = Yes, children only</p> <p><input type="checkbox"/> 2 = Yes, adults only</p> <p><input type="checkbox"/> 3 = Yes, both children and adults</p>                                                                                                                                                                                                                                                                                                                                                  |
| <p>9. Do the people in your household go without</p>                                                                                                                                                    | <p><input type="checkbox"/> 1 = Often</p> <p><input type="checkbox"/> 2 = Sometimes</p>                                                                                                                                                                                                                                                                                                                                                                                                                                                                               |

**Client Interview Day One (CD1)**

| Today's Date |   |   |   |   |   |
|--------------|---|---|---|---|---|
| d            | d | m | m | y | r |

| Participant ID |  |  |  |  |
|----------------|--|--|--|--|
|                |  |  |  |  |

|                                                                                                                                                                         |                                                                                                                                                                                                                                                                                                         |
|-------------------------------------------------------------------------------------------------------------------------------------------------------------------------|---------------------------------------------------------------------------------------------------------------------------------------------------------------------------------------------------------------------------------------------------------------------------------------------------------|
| food often, sometimes, seldom, or never?                                                                                                                                | <input type="checkbox"/> 3 = Seldom<br><input type="checkbox"/> 4 = Never                                                                                                                                                                                                                               |
| 10. a. Are you losing any income while you're at the clinic/hospital today?<br><br>b. IF YES, How much?                                                                 | <input type="checkbox"/> Yes (1)<br><input type="checkbox"/> No (0)<br><br>How much: R ____ . ____                                                                                                                                                                                                      |
| 11. Do you have to pay for childcare while you are here?<br><br>IF YES, How much?                                                                                       | <input type="checkbox"/> Yes (1)<br><input type="checkbox"/> No (0)<br><br>How much: R ____ . ____                                                                                                                                                                                                      |
| 12. a. How much does it cost for you to come to the clinic/hospital from your home?<br><br>b. And how long does it take to come to the clinic/hospital from your house? | R ____ . ____<br><br>____ : ____<br>H H M M                                                                                                                                                                                                                                                             |
| 13. What type of housing do you live in?                                                                                                                                | <input type="checkbox"/> House (1)<br><input type="checkbox"/> Flat (2)<br><input type="checkbox"/> Cottage (behind another house) (3)<br><input type="checkbox"/> Shack (4)<br><input type="checkbox"/> Student Residence (5)<br><input type="checkbox"/> Other (6)<br>If other, specify:              |
| 14. Where is (Response to 13) located?                                                                                                                                  | <input type="checkbox"/> On the premises where you work(1)<br><input type="checkbox"/> In the city (2)<br><input type="checkbox"/> In an informal settlement(3)<br><input type="checkbox"/> In a rural area (4)<br><input type="checkbox"/> Other (5)                                                   |
| 15. How many rooms are there where you currently stay, excluding bathrooms, halls and passages?                                                                         |                                                                                                                                                                                                                                                                                                         |
| 16. Including yourself, how many adults and/or children live in that place? Please include anyone who stayed there at least 15 out of the last 30 days.                 | Total number of adults or children <u>≥ 16 years old</u> :<br><br>Total number of children < 16 years old:                                                                                                                                                                                              |
| 17. What is the most often used source of <u>drinking</u> water at the place where you stay?                                                                            | <input type="checkbox"/> 1 = Piped – in the home<br><input type="checkbox"/> 2 = Piped – tap in own yard/garden<br><input type="checkbox"/> 3 = Piped - public tap/kiosk (free)<br><input type="checkbox"/> 4 = Piped - public tap/kiosk (paid for)<br><input type="checkbox"/> 5 = Other water source, |

**Client Interview Day One (CD1)**

| Today's Date |   |   |   |   |   |
|--------------|---|---|---|---|---|
| d            | d | m | m | y | r |

| Participant ID |  |  |  |  |
|----------------|--|--|--|--|
|                |  |  |  |  |

|                                                                                                          |                                                                                                                                                                                                                                                                                                                             |   |   |   |   |  |  |   |   |   |   |   |   |
|----------------------------------------------------------------------------------------------------------|-----------------------------------------------------------------------------------------------------------------------------------------------------------------------------------------------------------------------------------------------------------------------------------------------------------------------------|---|---|---|---|--|--|---|---|---|---|---|---|
| <p>18. What kind of toilet do you have at the place where you stay?</p>                                  | <p><input type="checkbox"/> 1 = Flush toilet<br/> <input type="checkbox"/> 2 = Improved pit latrine with ventilation (vip)<br/> <input type="checkbox"/> 3 = Other pit latrine<br/> <input type="checkbox"/> 4 = Bucket toilet<br/> <input type="checkbox"/> 5 = Chemical toilet<br/> <input type="checkbox"/> 6 = None</p> |   |   |   |   |  |  |   |   |   |   |   |   |
| <p>19. Is that place connected to an electricity supply?</p>                                             | <p><input type="checkbox"/> 0 = No<br/> <input type="checkbox"/> 1 = Yes</p>                                                                                                                                                                                                                                                |   |   |   |   |  |  |   |   |   |   |   |   |
| <p>20. Do you have a television there?</p>                                                               | <p><input type="checkbox"/> 0 = No<br/> <input type="checkbox"/> 1 = Yes</p>                                                                                                                                                                                                                                                |   |   |   |   |  |  |   |   |   |   |   |   |
| <p>21. Do you have a radio there?</p>                                                                    | <p><input type="checkbox"/> 0 = No<br/> <input type="checkbox"/> 1 = Yes</p>                                                                                                                                                                                                                                                |   |   |   |   |  |  |   |   |   |   |   |   |
| <p>22. How many times have you been pregnant and what were the results of each pregnancy?</p>            | <p>Provider number of each:</p> <p>_____ Normal vaginal birth<br/>         _____ Cesarean<br/>         _____ Miscarriage (spontaneous abortion)<br/>         _____ TOP<br/>         _____ Ectopic pregnancy</p> <p>_____ Total</p>                                                                                          |   |   |   |   |  |  |   |   |   |   |   |   |
| <p>23. How many live births have you had?</p>                                                            |                                                                                                                                                                                                                                                                                                                             |   |   |   |   |  |  |   |   |   |   |   |   |
| <p>24. a. Have you ever used a family planning method?</p> <p>b. IF YES, What methods have you used?</p> | <p><input type="checkbox"/> Yes (1)<br/> <input type="checkbox"/> No (0)</p> <p>List method(s):</p>                                                                                                                                                                                                                         |   |   |   |   |  |  |   |   |   |   |   |   |
| <p>25. Before coming for this TOP, <b>when</b> did you first suspect that you were pregnant?</p>         | <table border="1"> <tbody> <tr> <td></td> <td></td> <td></td> <td></td> <td></td> <td></td> </tr> <tr> <td>D</td> <td>D</td> <td>M</td> <td>M</td> <td>Y</td> <td>Y</td> </tr> </tbody> </table>                                                                                                                            |   |   |   |   |  |  | D | D | M | M | Y | Y |
|                                                                                                          |                                                                                                                                                                                                                                                                                                                             |   |   |   |   |  |  |   |   |   |   |   |   |
| D                                                                                                        | D                                                                                                                                                                                                                                                                                                                           | M | M | Y | Y |  |  |   |   |   |   |   |   |

**Client Interview Day One (CD1)**

| Today's Date |   |   |   |   |   |
|--------------|---|---|---|---|---|
| d            | d | m | m | y | r |

| Participant ID |  |  |  |  |
|----------------|--|--|--|--|
|                |  |  |  |  |

|                                                                                                                                                                                                                                                                 |                                                                                                                                                                                                                                                                                                                                                                                                                                                                             |   |   |   |   |  |  |   |   |   |   |   |   |
|-----------------------------------------------------------------------------------------------------------------------------------------------------------------------------------------------------------------------------------------------------------------|-----------------------------------------------------------------------------------------------------------------------------------------------------------------------------------------------------------------------------------------------------------------------------------------------------------------------------------------------------------------------------------------------------------------------------------------------------------------------------|---|---|---|---|--|--|---|---|---|---|---|---|
| <p>26. Why did you suspect that you were pregnant?</p> <p>a. Did you have a positive pregnancy test before today?</p> <p>IF YES FOR 16A,</p> <p>a1. When?</p> <p>a2. Where?</p> <p>a3. How much did it cost?</p>                                                | <p>RESPONSE:</p> <p><input type="checkbox"/> Yes (1)<br/><input type="checkbox"/> No (0)</p> <table border="1"> <tr> <td></td><td></td><td></td><td></td><td></td><td></td> </tr> <tr> <td align="center">D</td><td align="center">D</td><td align="center">M</td><td align="center">M</td><td align="center">Y</td><td align="center">Y</td> </tr> </table> <p><input type="checkbox"/> At home (1)<br/><input type="checkbox"/> At a clinic (2)</p> <p>R_____ . _____</p> |   |   |   |   |  |  | D | D | M | M | Y | Y |
|                                                                                                                                                                                                                                                                 |                                                                                                                                                                                                                                                                                                                                                                                                                                                                             |   |   |   |   |  |  |   |   |   |   |   |   |
| D                                                                                                                                                                                                                                                               | D                                                                                                                                                                                                                                                                                                                                                                                                                                                                           | M | M | Y | Y |  |  |   |   |   |   |   |   |
| <p>27. When did you decide to have a TOP?</p>                                                                                                                                                                                                                   |                                                                                                                                                                                                                                                                                                                                                                                                                                                                             |   |   |   |   |  |  |   |   |   |   |   |   |
| <p>28. What are your reasons for seeking a TOP?</p>                                                                                                                                                                                                             | <p>OPEN RESPONSE:</p>                                                                                                                                                                                                                                                                                                                                                                                                                                                       |   |   |   |   |  |  |   |   |   |   |   |   |
| <p>29. a. After deciding to have a TOP, did you go to a clinic immediately, or did you delay for some time?</p> <p>b. IF DELAYED, For how long did you delay going to a clinic to ask for TOP?</p> <p>c. IF DELAYED, Why did you delay going to the clinic?</p> | <p><input type="checkbox"/> Went immediately (1)<br/><input type="checkbox"/> Delayed (2)</p> <p>How long delayed:</p> <p>Why delayed:</p>                                                                                                                                                                                                                                                                                                                                  |   |   |   |   |  |  |   |   |   |   |   |   |

**Client Interview Day One (CD1)**

| Today's Date |   |   |   |   |   |
|--------------|---|---|---|---|---|
| d            | d | m | m | y | r |

| Participant ID |  |  |  |  |
|----------------|--|--|--|--|
|                |  |  |  |  |

|                                                                                                                                                                                                                                                                                      |                                                                                                                                                                                                                                                                                                                                                    |   |   |   |   |  |  |   |   |   |   |   |   |
|--------------------------------------------------------------------------------------------------------------------------------------------------------------------------------------------------------------------------------------------------------------------------------------|----------------------------------------------------------------------------------------------------------------------------------------------------------------------------------------------------------------------------------------------------------------------------------------------------------------------------------------------------|---|---|---|---|--|--|---|---|---|---|---|---|
| <p>30. Before going to a clinic for a TOP, how did you get information on TOP?</p>                                                                                                                                                                                                   |                                                                                                                                                                                                                                                                                                                                                    |   |   |   |   |  |  |   |   |   |   |   |   |
| <p>31. a. Is this clinic/hospital the first place you went when you decided to have a TOP?</p> <p>b. When did you first come here/go there?</p> <p>c. IF NO FOR 21A, What was the first facility you went to?</p> <p>d. What happened when you were there? What did they do?</p>     | <p><input type="checkbox"/> Yes (1)<br/><input type="checkbox"/> No (0)</p> <table border="1" style="width: 100%; text-align: center;"> <tr> <td> </td><td> </td><td> </td><td> </td><td> </td><td> </td> </tr> <tr> <td>D</td><td>D</td><td>M</td><td>M</td><td>Y</td><td>Y</td> </tr> </table> <p>List first facility:</p> <p>OPEN RESPONSE:</p> |   |   |   |   |  |  | D | D | M | M | Y | Y |
|                                                                                                                                                                                                                                                                                      |                                                                                                                                                                                                                                                                                                                                                    |   |   |   |   |  |  |   |   |   |   |   |   |
| D                                                                                                                                                                                                                                                                                    | D                                                                                                                                                                                                                                                                                                                                                  | M | M | Y | Y |  |  |   |   |   |   |   |   |
| <p>32. Why did you come to this facility for a TOP?</p>                                                                                                                                                                                                                              |                                                                                                                                                                                                                                                                                                                                                    |   |   |   |   |  |  |   |   |   |   |   |   |
| <p>33. a. Before coming to this facility had you ever heard of medication abortion, or TOP by taking pills?</p> <p>b. IF YES, Did you know that medication abortion was available at this facility before you came here?</p>                                                         | <p><input type="checkbox"/> Yes (1)<br/><input type="checkbox"/> No (0)</p> <p><input type="checkbox"/> Yes (1)<br/><input type="checkbox"/> No (0)</p>                                                                                                                                                                                            |   |   |   |   |  |  |   |   |   |   |   |   |
| <p>34. We know that some women in South Africa try to do TOP at home using herbs or tablets or drinking special mixes. Some women also try to do it outside of a clinic or hospital by calling special phone numbers that advertise TOPs. Before coming to this clinic/hospital,</p> | <p><input type="checkbox"/> Yes (1)<br/><input type="checkbox"/> No (0)</p> <p><input type="checkbox"/> IF YES, OPEN RESPONSE:</p>                                                                                                                                                                                                                 |   |   |   |   |  |  |   |   |   |   |   |   |

**Client Interview Day One (CD1)**

| Today's Date |   |   |   |   |   |
|--------------|---|---|---|---|---|
| d            | d | m | m | y | r |

| Participant ID |  |  |  |  |
|----------------|--|--|--|--|
|                |  |  |  |  |

|                                                                                                                                                                                                          |                                                                                                                                                                                                                           |
|----------------------------------------------------------------------------------------------------------------------------------------------------------------------------------------------------------|---------------------------------------------------------------------------------------------------------------------------------------------------------------------------------------------------------------------------|
| <p>did you try any other methods to end this pregnancy?<br/>IF YES, What did you try?</p>                                                                                                                |                                                                                                                                                                                                                           |
| <p>35. When you met with the doctor/nurse today, did you choose to have medication abortion or surgical abortion?</p>                                                                                    | <input type="checkbox"/> Medication abortion (1)<br><input type="checkbox"/> Surgical abortion (2)                                                                                                                        |
| <p>36. Why did you choose that type of TOP?</p>                                                                                                                                                          |                                                                                                                                                                                                                           |
| <p>37. Why did you not choose [MVA/MA] (SEE RESPONSE IN 36)</p>                                                                                                                                          |                                                                                                                                                                                                                           |
| <p>38. a. IF SHE CHOSE MEDICATION ABORTION, Did you receive mifepristone today?</p> <p>b. And did you receive misoprostol tablets to take home?</p> <p>c. And did you receive other pain medication?</p> | <input type="checkbox"/> Yes (1)<br><input type="checkbox"/> No (0)<br><br><input type="checkbox"/> Yes (1)<br><input type="checkbox"/> No (0)<br><br><input type="checkbox"/> Yes (1)<br><input type="checkbox"/> No (0) |
| <p>39. a. IF SHE CHOSE SURGICAL ABORTION, When is your appointment for a surgical TOP?</p>                                                                                                               | <p>Date/time:</p>                                                                                                                                                                                                         |
| <p>40. Were you using a contraceptive method when you became pregnant this time? IF YES, which one?</p>                                                                                                  |                                                                                                                                                                                                                           |
| <p>41. Were you told about contraception in your visit today?</p>                                                                                                                                        |                                                                                                                                                                                                                           |
| <p>42. Were you asked which contraceptive method you were using?</p>                                                                                                                                     |                                                                                                                                                                                                                           |

**Client Interview Day One (CD1)**

| Today's Date |   |   |   |   |   |
|--------------|---|---|---|---|---|
| d            | d | m | m | y | r |

| Participant ID |  |  |  |  |
|----------------|--|--|--|--|
|                |  |  |  |  |

|                                                                                                                                                                                      |                                                                                                    |
|--------------------------------------------------------------------------------------------------------------------------------------------------------------------------------------|----------------------------------------------------------------------------------------------------|
| <p>43. Were you given a contraceptive method today?</p> <p>a. IF NO, Would you have liked a contraceptive method? Why or why not?</p> <p>b. IF YES, What method did you receive?</p> | <p><input type="checkbox"/> Yes (1)</p> <p><input type="checkbox"/> No (0)</p> <p>a.</p> <p>b.</p> |
|--------------------------------------------------------------------------------------------------------------------------------------------------------------------------------------|----------------------------------------------------------------------------------------------------|

44. **Follow-up interview date:** \_\_\_\_\_ OR (circle) Not applicable

|                           |  |
|---------------------------|--|
| <b>Initials and date:</b> |  |
|---------------------------|--|

|                           |
|---------------------------|
| <p>INTERVIEWER NOTES:</p> |
|---------------------------|
