# Supplementary material for: The costs and cost effectiveness of providing first-trimester, medical and surgical safe abortion services in KwaZulu-Natal Province, South Africa
Source: PLOS journal article supplement (doi:10.1371/journal.pone.0174615), 2017-04-03
Supplement: S2 (10.1371/journal.pone.0174615.s002) [file journal.pone.0174615.s002]

# Medication Abortion Screening Checklist (MASP)

| Today's Date |   |   |   |   |   |
|--------------|---|---|---|---|---|
| d            | d | m | m | y | r |

| Participant ID |  |  |  |  |
|----------------|--|--|--|--|
|                |  |  |  |  |

Facility ID

|  |  |  |
|--|--|--|
|  |  |  |
|--|--|--|

Provider Initials

|  |  |  |
|--|--|--|
|  |  |  |
|--|--|--|

*Instructions: (PROVIDER) Use this form to assess the woman's eligibility for medication abortion. For open responses, write the response in space provided. For Yes/No questions, tick the appropriate box.*

## I. MEDICATION ABORTION ELIGIBILITY AND PROCEDURE CHOICE

| Question                                                                                                                                                                                                               | Response                         |                                 |
|------------------------------------------------------------------------------------------------------------------------------------------------------------------------------------------------------------------------|----------------------------------|---------------------------------|
| 1. Positive urine pregnancy test or other confirmation of pregnancy?                                                                                                                                                   | <input type="checkbox"/> Yes (1) | <input type="checkbox"/> No (0) |
| 2. a. Gestational age ≤ 84 days (12 weeks)?                                                                                                                                                                            | <input type="checkbox"/> Yes (1) | <input type="checkbox"/> No (0) |
| b. Gestational age ≤ 63 days (9 weeks)?                                                                                                                                                                                | <input type="checkbox"/> Yes (1) | <input type="checkbox"/> No (0) |
| c. If yes, was this based on (tick all that apply)                                                                                                                                                                     | <input type="checkbox"/> Yes (1) | <input type="checkbox"/> No (0) |
| i. LMP? Date of LMP:<br><br>_____dd_____mm_____yy                                                                                                                                                                      | COMPLETE DATE                    |                                 |
| ii. Provider's clinical assessment?                                                                                                                                                                                    | <input type="checkbox"/> Yes (1) | <input type="checkbox"/> No (0) |
| iii. Provider's ultrasound assessment?<br><br>BPD: <input type="checkbox"/> <input type="checkbox"/> <input type="checkbox"/> mm<br>CRL: <input type="checkbox"/> <input type="checkbox"/> <input type="checkbox"/> mm | COMPLETE MM.                     |                                 |
| 3. Final gestational age assessment:                                                                                                                                                                                   | _____wks _____dys                |                                 |
| <b>IF NOT PREGNANT OR ABOVE 63 DAYS OF GESTATIONAL AGE, STOP HERE. IF 63 DAYS OR LESS, PROCEED.</b>                                                                                                                    |                                  |                                 |
| 4. Does she live or work within 1 hour of an emergency medical facility?                                                                                                                                               | <input type="checkbox"/> Yes (1) | <input type="checkbox"/> No (0) |
| 5. Is she willing to come for at least one follow-up visit?                                                                                                                                                            | <input type="checkbox"/> Yes (1) | <input type="checkbox"/> No (0) |
| 6. a. Are there any contraindications to medication abortion?<br>b. IF YES, please specify:                                                                                                                            | <input type="checkbox"/> Yes (1) | <input type="checkbox"/> No (0) |
| If all of the answers to Questions 1 to 6 appear in shaded sections, the woman is eligible for medication abortion. Continue to complete this form.                                                                    | <input type="checkbox"/> Yes (1) | <input type="checkbox"/> No (0) |
| 7. Is the patient eligible for medication abortion?                                                                                                                                                                    | <input type="checkbox"/> Yes (1) | <input type="checkbox"/> No (0) |

### Medication Abortion Screening Checklist (MASP)

| Today's Date |   |   |   |   |   |
|--------------|---|---|---|---|---|
| d            | d | m | m | y | r |

| Participant ID |  |  |  |  |
|----------------|--|--|--|--|
|                |  |  |  |  |

If 7 is YES, provide information on medication abortion and ask the woman to choose either medication or surgical abortion.

8. Indicate her choice of procedures:

☐ Medical  
TOP (1)

☐ Surgical  
TOP (2)

#### II. BRIEF MEDICAL HISTORY

9. a. Does she take medication(s) on a daily basis?

☐ Yes (1)

☐ No (0)  
SKIP B.

b. If yes, please note what medication(s) she takes (name of drug, dosage and frequency).

10. a. Other comments/concerns (other medical conditions or history)

☐ Yes (1)

☐ No (0)

b. If yes, describe

### Medication Abortion Screening Checklist (MASP)

| Today's Date |   |   |   |   |   |
|--------------|---|---|---|---|---|
| d            | d | m | m | y | r |

| Participant ID |  |  |  |  |
|----------------|--|--|--|--|
|                |  |  |  |  |

|  |  |  |
|--|--|--|
|  |  |  |
|--|--|--|

### III. COMPLETE THIS SECTION FOR MEDICAL ABORTION CLIENTS ONLY

***If the woman has chosen medication abortion, administer mifepristone, and complete the following:***

|                                           |                                   |
|-------------------------------------------|-----------------------------------|
| 11. Time mifepristone taken by woman:     | ____ h ____ (24 hr clock)         |
| 12. Date mifepristone taken by woman:     | day ____ / month ____ / year ____ |
| 13. Number of mifepristone tablets given: |                                   |
| 15. Lot number:                           |                                   |

***Then provide her with 4 misoprostol tablets (200 µg each).***

|                                          |  |
|------------------------------------------|--|
| 16. Number of misoprostol tablets given: |  |
| 17. Lot number(s):                       |  |

***Provide the woman with analgesics and advise her to take for pain management (per guidelines established in training).***

|                            |                                                                                                                                                 |
|----------------------------|-------------------------------------------------------------------------------------------------------------------------------------------------|
| 18. Pain medication given: | <div style="margin-bottom: 10px;">A. Type:</div> <div style="margin-bottom: 10px;">B. Dosage per tablet:</div> <div>C. Number of tablets:</div> |
|----------------------------|-------------------------------------------------------------------------------------------------------------------------------------------------|

***Then give her the Patient Information Sheet and explain to her that...***

- ***She needs to take the misoprostol at home approximately 48 hours after taking mifepristone.***
- ***She may be nauseated, vomit or have diarrhea after taking misoprostol.***

### Medication Abortion Screening Checklist (MASP)

| Today's Date |   |   |   |   |   |
|--------------|---|---|---|---|---|
| d            | d | m | m | y | r |

| Participant ID |  |  |  |  |
|----------------|--|--|--|--|
|                |  |  |  |  |

- 
- ***She will probably also have abdominal pain or cramping stronger than menses.***
  - ***She will also have bleeding which may be heavier than she usually experiences with her menses and that all of these side effects are temporary.***
  - ***If she forgets to take misoprostol in 48 hours she should take it as soon as she remembers.***
  - ***Explain that she has been given a telephone number (in the consent form) to call in case of a medical emergency or if she has any questions or concerns during the study.***

#### **IV. COMPLETE THESE SECTION FOR SURGICAL CLIENTS ONLY**

|                                |                                                                                                                                                                                                                                                                                                                                                                                                                                                   |                 |                 |                 |                 |  |  |                 |                 |                 |                 |                 |                 |
|--------------------------------|---------------------------------------------------------------------------------------------------------------------------------------------------------------------------------------------------------------------------------------------------------------------------------------------------------------------------------------------------------------------------------------------------------------------------------------------------|-----------------|-----------------|-----------------|-----------------|--|--|-----------------|-----------------|-----------------|-----------------|-----------------|-----------------|
| <b>19. Date booked for TOP</b> | <table border="1" style="margin: auto;"> <tr> <td style="width: 33.33%; height: 30px;"></td> <td style="width: 33.33%;"></td> </tr> <tr> <td><b><i>D</i></b></td> <td><b><i>D</i></b></td> <td><b><i>M</i></b></td> <td><b><i>M</i></b></td> <td><b><i>Y</i></b></td> <td><b><i>Y</i></b></td> </tr> </table> |                 |                 |                 |                 |  |  | <b><i>D</i></b> | <b><i>D</i></b> | <b><i>M</i></b> | <b><i>M</i></b> | <b><i>Y</i></b> | <b><i>Y</i></b> |
|                                |                                                                                                                                                                                                                                                                                                                                                                                                                                                   |                 |                 |                 |                 |  |  |                 |                 |                 |                 |                 |                 |
| <b><i>D</i></b>                | <b><i>D</i></b>                                                                                                                                                                                                                                                                                                                                                                                                                                   | <b><i>M</i></b> | <b><i>M</i></b> | <b><i>Y</i></b> | <b><i>Y</i></b> |  |  |                 |                 |                 |                 |                 |                 |
